# Supplementary material for: Cobalt encapsulated in bamboo-like N-doped carbon nanotubes for highly sensitive electroanalysis of Pb(ii): enhancement based on adsorption and catalysis
Source: Royal Society of Chemistry journal article supplement (doi:10.1039/d0ay02330b), 2021-01-01
Supplement: d0ay02330b1.pdf [file d0ay02330b1.pdf]

**Supplementary Information for**

**Highly sensitive cobalt encapsulated in bamboo-like N-doped carbon nanotube  
for electroanalysis of Pb(II): Enhancement based on adsorption and catalysis**

Qian-Qian Xu<sup>a</sup>, Xu Xia<sup>a</sup>, Min Zhu<sup>a</sup>, Li-Hao Xu<sup>a</sup>, Yong-Xing Zhang<sup>a</sup> and Shan-Shan  
Li<sup>a,\*</sup>

<sup>a</sup> Anhui Province Key Laboratory of Pollutant Sensitive Materials and Environmental  
Remediation, Department of materials science and engineering, Huaibei Normal  
University, Huaibei 235000, P. R. China.

\* Correspondence should be addressed to S.S.L. E-mail: sa157002@mail.ustc.edu.cn

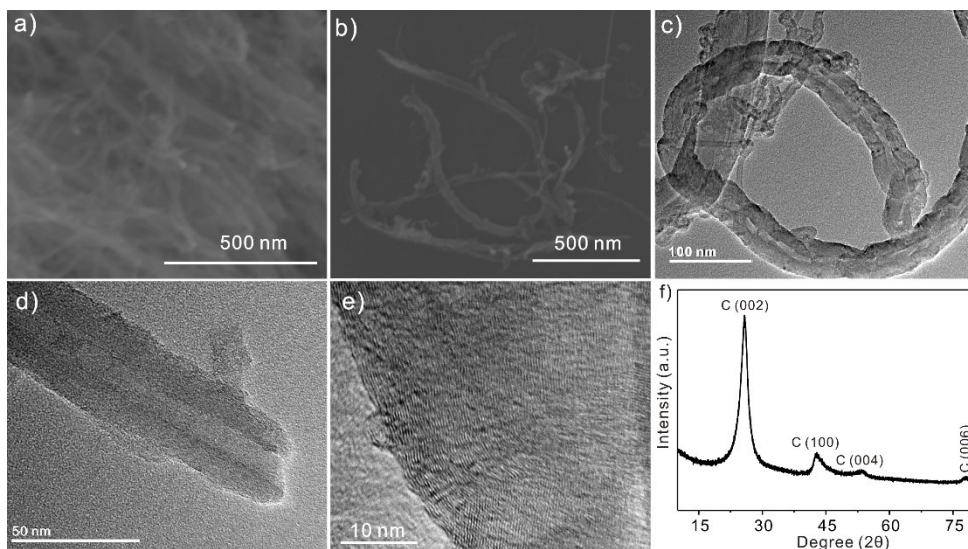

**Fig. S1.** (a, b) SEM image, (c, d) TEM image, (e) HRTEM image and (f) XRD pattern of commercially purchased pure CNTs.

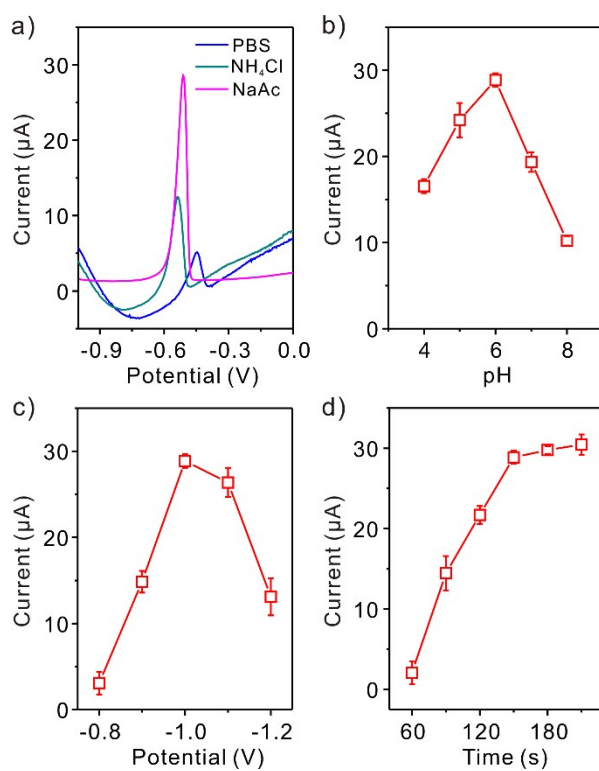

**Fig. S2.** The effect of (a) supporting electrolytes, (b) pH value, (c) deposition potential and (d) deposition time on Co/N-CNTs for the detection of 0.5  $\mu\text{M}$  Pb(II).

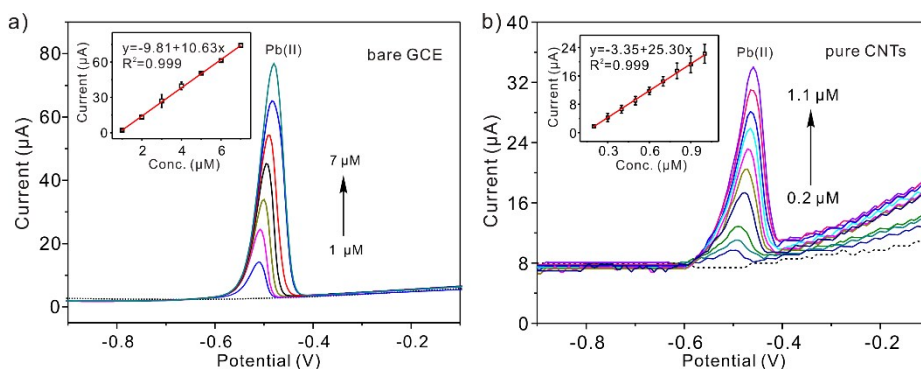

**Fig. S3.** SWASV responses to different concentration Pb(II) on bare (a) and pure CNTs (b), and their corresponding calibration plots in 0.1 M HAc-NaAc solution.

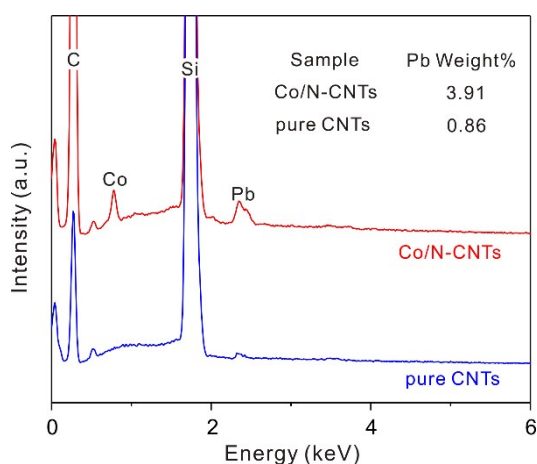

**Fig. S4.** EDS spectra of Co/N-CNTs and pure CNTs after adsorption with 5 mM Pb(II).

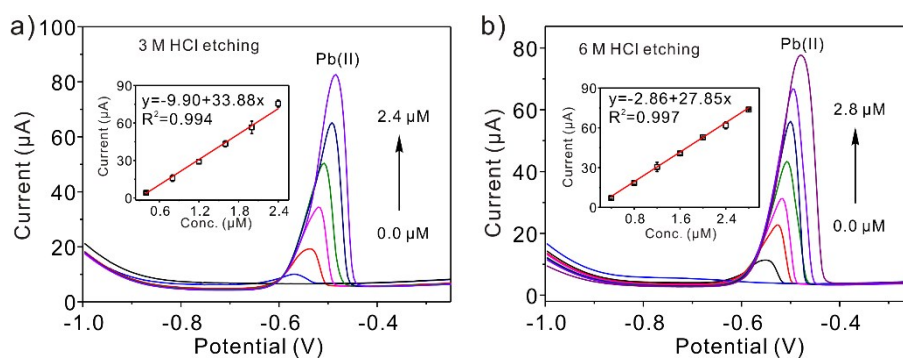

**Fig. S5.** SWASV responses to different concentration Pb(II) on Co/N-CNTs with (a) 3 M HCl and (b) 6 M HCl etching, and their corresponding calibration plots in 0.1 M HAc-NaAc solution.

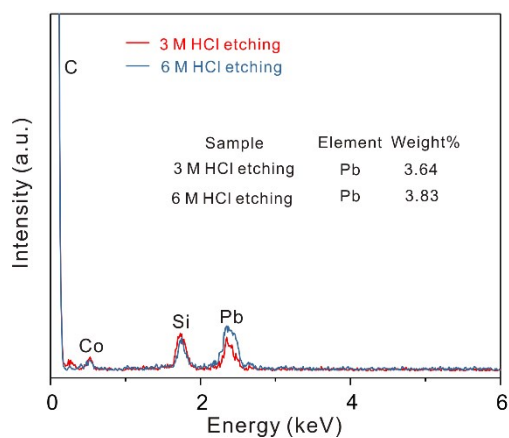

**Fig. S6.** EDS spectra of Co/N-CNTs with 3 M and (b) 6 M HCl etching after adsorption with 5 mM Pb(II).

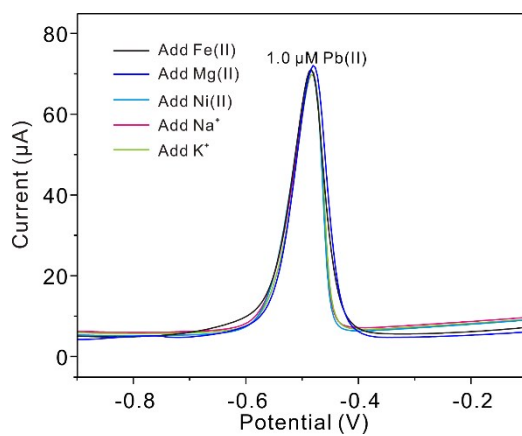

**Fig. S7.** The interference of 10  $\mu\text{M}$  transition elements and alkaline metals (including Fe(II), Mg(II), Ni(II),  $\text{K}^+$ , and  $\text{Na}^+$ ) towards 1.0  $\mu\text{M}$  Pb(II) detection.

**Table S1.** Comparison of the sensitivities and LODs with previously works on various carbon based nanomaterials modified electrodes toward Pb(II).

| Electrodes                                        | Sensitivity<br>( $\mu\text{A } \mu\text{M}^{-1}$ ) | LOD<br>( $\mu\text{M}$ ) | Ref.      |
|---------------------------------------------------|----------------------------------------------------|--------------------------|-----------|
| Nitrogen-doped microporous carbon                 | 1.9                                                | 0.16                     | 1         |
| Graphene modified carbon nanosheet                | 92.9                                               | 1.12                     | 2         |
| O <sub>2</sub> -plasma-oxidized multi-walled CNTs | 3.55                                               | 0.057                    | 3         |
| MnO <sub>2</sub> /carbon composites               | -                                                  | 0.027                    | 4         |
| AlOOH-RGO GCE                                     | 2.97                                               | $7.6 \times 10^{-5}$     | 5         |
| EDTA_PANI/SWCNTs                                  | -                                                  | 0.07                     | 6         |
| EDTA-Ppy/SWCNTs                                   | -                                                  | 1.65                     | 7         |
| Co/N-CNTs                                         | 69.74                                              | 0.039                    | This work |

### References

1. S. Y. Zhao, Y. Cheng, J. P. Veder, B. Johannessen, M. Saunders, L. J. Zhang, C. Liu, M. F. Chisholm, R. De Marco, J. Liu, S. Z. Yang and S. P. Jiang, *ACS Appl. Energ. Mater.*, 2018, 1, 5286-5297.
2. J. T. Zhang, Z. Y. Jin, W. C. Li, W. Dong and A. H. Lu, *J. Mater. Chem. A*, 2013, 1, 13139-13145.
3. Y. Wei, Z. G. Liu, X. Y. Yu, L. Wang, J. H. Liu and X. J. Huang, *Electrochem. Commun.*, 2011, 13, 1506-1509.
4. M. Malisic, A. Janosevic, B. S. Paunkovic, I. Stojkovic and G. Ciric-Marjanovic, *Electrochim Acta*, 2012, 74, 158-164.
5. C. Gao, X. Y. Yu, R. X. Xu, J. H. Liu and X. J. Huang, *ACS Appl. Mater. Interfaces*, 2012, 4, 4672-4682.
6. M. A. Deshmukh, R. Celiesiute, A. Ramanaviciene, M. D. Shirsat and A. Ramanavicius, *Electrochim. Acta*, 2018, 259, 930-938.
7. M. A. Deshmukh, G. A. Bodkhe, S. Shirsat, A. Ramanavicius and M. D. Shirsat, *Front. Chem.*, 2018, 6, 451.
